# Supplementary material for: Tissue-specific transcriptome profiling of Drosophila reveals roles for GATA transcription factors in longevity by dietary restriction
Source: PubMed Central journal article supplement (PMC5904217; doi:10.1038/s41514-018-0024-4), 2018-04-17
Supplement: 41514_2018_24_MOESM1_ESM.pdf [file 41514_2018_24_MOESM1_ESM.pdf]

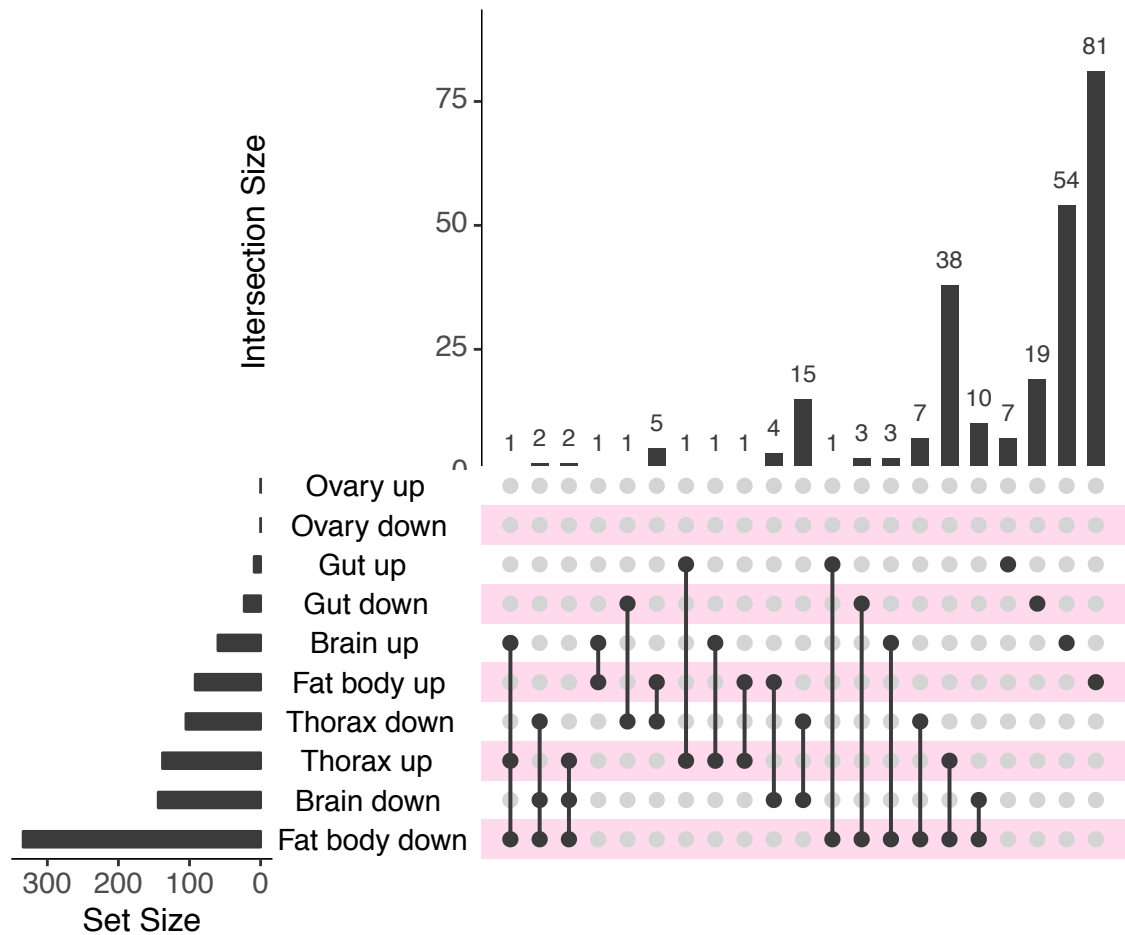

1

2 **Supplementary Figure S1. Intersections of DE gene sets amongst tissues.**

3 Each row of the matrix represents the sets of genes that were DE in response to DR  
 4 in each tissue. Each column represents the intersection between those sets, visual-  
 5 ised by points connecting rows of the matrix. A single point is plotted for genes which  
 6 are unique to one set. For example, of the five genes upregulated by DR in the gut,  
 7 four were unique to that set, and one was also down-regulated in the fat body.
