# Supplementary material for: Tissue-specific transcriptome profiling of Drosophila reveals roles for GATA transcription factors in longevity by dietary restriction
Source: PubMed Central journal article supplement (PMC5904217; doi:10.1038/s41514-018-0024-4), 2018-04-17
Supplement: 41514_2018_24_MOESM2_ESM.pdf [file 41514_2018_24_MOESM2_ESM.pdf]

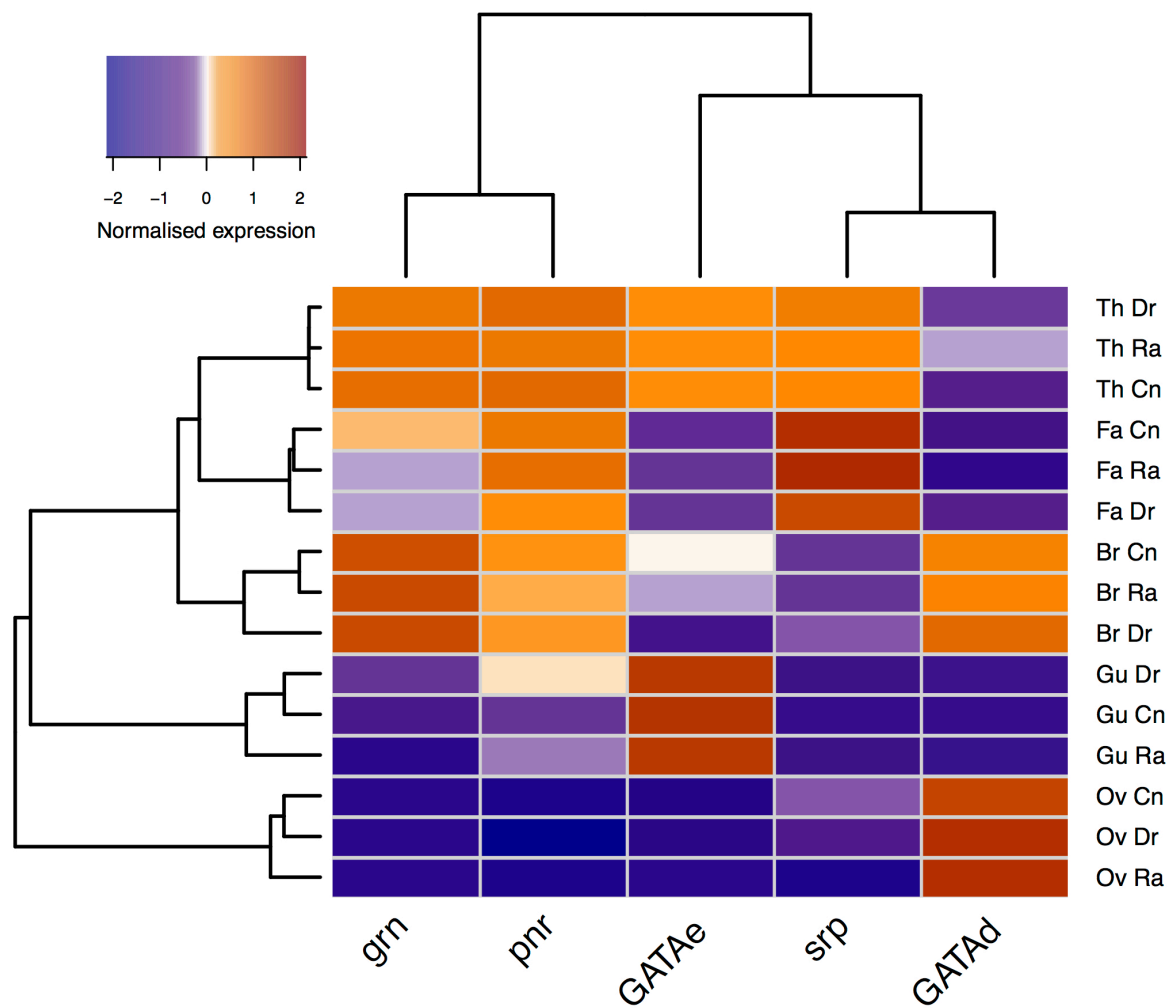

1

2

3 **Supplementary Figure S2. GATA TFs are expressed by a tissue-specific pattern.**

4 **tern.** For each of the five *Drosophila* GATA TFs, median expression per tissue and

5 experimental condition is plotted, of variance-stabilised read counts. Dendrograms

6 represent hierarchical clustering by a Euclidian distance metric. Row labels indicate

7 tissue (Br=Brain, Fa=Fat body, Gu=Gut, Ov=Ovary, Th=Thorax) and diet (Dr=DR,

8 Ra=Rapamycin, Cn=Control). Values are column-scaled Z-scores of medians of va-

9 rianced-stabilised reads.
